# Supplementary material for: Dual-Task Elderly Gait of Prospective Fallers and Non-Fallers: A Wearable-Sensor Based Analysis
Source: PubMed Central journal article supplement (PMC5948604; doi:10.3390/s18041275), 2018-04-21
Supplement: sensors-18-01275-s001.pdf [file sensors-18-01275-s001.pdf]

## Supplementary Tables

**Table S1.** Mixed-design ANOVA tests results for pressure-sensing insole variables. **Bold**

indicates a significant difference ( $p < 0.05$ ).

|                                  | <b>Mixed-Design ANOVA Analysis</b>                                              |                                                 |                                                  |
|----------------------------------|---------------------------------------------------------------------------------|-------------------------------------------------|--------------------------------------------------|
|                                  | <b>Walking Condition Main Effect</b>                                            | <b>Faller/Non-Faller Status Main Effect</b>     | <b>Interaction Effect</b>                        |
| <b>CoP Path</b>                  |                                                                                 |                                                 |                                                  |
| PD per Stride                    | <b>F(1,73) = 31.166, <math>p &lt; 0.001</math>, <math>\eta^2 = 0.299</math></b> | F(1,73) = 0.102, $p = 0.750$ , $\eta^2 = 0.001$ | F(1,73) = 0.318, $p = 0.575$ , $\eta^2 = 0.004$  |
| PD Length (mm)                   | F(1,73) = 0.144, $p = 0.705$ , $\eta^2 = 0.002$                                 | F(1,73) = 0.070, $p = 0.792$ , $\eta^2 = 0.001$ | F(1,73) = 0.191, $p = 0.664$ , $\eta^2 = 0.003$  |
| PD Duration (s)                  | F(1,73) = 0.651, $p = 0.423$ , $\eta^2 = 0.009$                                 | F(1,73) = 0.568, $p = 0.453$ , $\eta^2 = 0.008$ | F(1,73) = 0.611, $p = 0.437$ , $\eta^2 = 0.008$  |
| Medial Deviations per Stride (#) | F(1,73) = 3.039, $p = 0.086$ , $\eta^2 = 0.040$                                 | F(1,73) = 0.299, $p = 0.586$ , $\eta^2 = 0.004$ | F(1,73) = 0.043, $p = 0.836$ , $\eta^2 = 0.001$  |
| Medial Deviation Length (mm)     | F(1,73) = 1.303, $p = 0.257$ , $\eta^2 = 0.018$                                 | F(1,73) = 1.952, $p = 0.167$ , $\eta^2 = 0.026$ | F(1,73) = 1.655, $p = 0.202$ , $\eta^2 = 0.022$  |
| Lateral Deviation Length (mm)    | <b>F(1,73) = 4.705, <math>p = 0.033</math>, <math>\eta^2 = 0.061</math></b>     | F(1,73) = 0.899, $p = 0.346$ , $\eta^2 = 0.012$ | F(1,73) = 0.346, $p = 0.558$ , $\eta^2 = 0.005$  |
| ML Deviation Duration (s)        | <b>F(1,73) = 11.527, <math>p = 0.001</math>, <math>\eta^2 = 0.136</math></b>    | F(1,73) = 0.023, $p = 0.881$ , $\eta^2 < 0.001$ | F(1,73) = 0.311, $p = 0.579$ , $\eta^2 = 0.004$  |
| Min CoP Vel (m/s)                | <b>F(1,73) = 35.113, <math>p &lt; 0.001</math>, <math>\eta^2 = 0.325</math></b> | F(1,73) = 1.024, $p = 0.315$ , $\eta^2 = 0.014$ | F(1,73) = 0.504, $p = 0.480$ , $\eta^2 = 0.007$  |
| Max CoP Vel (m/s)                | F(1,73) = 2.223, $p = 0.140$ , $\eta^2 = 0.030$                                 | F(1,73) = 0.023, $p = 0.881$ , $\eta^2 < 0.001$ | F(1,73) = 1.323, $p = 0.254$ , $\eta^2 = 0.018$  |
| Mean CoP Vel (m/s)               | <b>F(1,73) = 68.784, <math>p &lt; 0.001</math>, <math>\eta^2 = 0.485</math></b> | F(1,73) = 0.223, $p = 0.638$ , $\eta^2 = 0.003$ | F(1,73) = 0.939, $p = 0.336$ , $\eta^2 = 0.013$  |
| Median CoP Vel (m/s)             | <b>F(1,73) = 91.911, <math>p &lt; 0.001</math>, <math>\eta^2 = 0.557</math></b> | F(1,73) = 0.209, $p = 0.649$ , $\eta^2 = 0.003$ | F(1,73) = 0.062, $p = 0.804$ , $\eta^2 = 0.001$  |
| <b>Temporal</b>                  |                                                                                 |                                                 |                                                  |
| Cadence (steps/minute)           | <b>F(1,73) = 75.960, <math>p &lt; 0.001</math>, <math>\eta^2 = 0.510</math></b> | F(1,73) = 0.003, $p = 0.957$ , $\eta^2 < 0.001$ | F(1,73) = 1.891, $p = 0.173$ , $\eta^2 = 0.025$  |
| Stride Time (s)                  | <b>F(1,73) = 62.868, <math>p &lt; 0.001</math>, <math>\eta^2 = 0.463</math></b> | F(1,73) = 0.058, $p = 0.810$ , $\eta^2 = 0.001$ | F(1,73) = 1.790, $p = 0.185$ , $\eta^2 = 0.024$  |
| Stance Time (s)                  | <b>F(1,73) = 51.289, <math>p &lt; 0.001</math>, <math>\eta^2 = 0.413</math></b> | F(1,73) = 0.018, $p = 0.894$ , $\eta^2 < 0.001$ | F(1,73) = 0.764, $p = 0.385$ , $\eta^2 = 0.010$  |
| Swing Time (s)                   | <b>F(1,73) = 43.638, <math>p &lt; 0.001</math>, <math>\eta^2 = 0.374</math></b> | F(1,73) = 0.448, $p = 0.505$ , $\eta^2 = 0.006$ | F(1,73) = 1.800, $p = 0.184$ , $\eta^2 = 0.024$  |
| Stride Time CoV                  | <b>F(1,73) = 12.405, <math>p = 0.001</math>, <math>\eta^2 = 0.145</math></b>    | F(1,73) = 0.901, $p = 0.346$ , $\eta^2 = 0.012$ | F(1,73) = 0.523, $p = 0.472$ , $\eta^2 = 0.0074$ |
| Stance Time CoV                  | F(1,73) = 0.127, $p = 0.723$ , $\eta^2 = 0.002$                                 | F(1,73) = 0.695, $p = 0.407$ , $\eta^2 = 0.009$ | F(1,73) = 1.049, $p = 0.309$ , $\eta^2 = 0.014$  |
| Swing Time CoV                   | F(1,73) = 0.194, $p = 0.661$ , $\eta^2 = 0.003$                                 | F(1,73) = 0.354, $p = 0.554$ , $\eta^2 = 0.005$ | F(1,73) = 0.007, $p = 0.935$ , $\eta^2 < 0.001$  |
| Percent Stance Time (%)          | F(1,73) = 0.123, $p = 0.727$ , $\eta^2 = 0.002$                                 | F(1,73) = 0.214, $p = 0.645$ , $\eta^2 = 0.003$ | F(1,73) = 0.435, $p = 0.512$ , $\eta^2 = 0.006$  |
| Percent Double-Support Time (%)  | F(1,73) = 0.057, $p = 0.812$ , $\eta^2 = 0.001$                                 | F(1,73) = 0.168, $p = 0.683$ , $\eta^2 = 0.002$ | F(1,73) = 0.304, $p = 0.583$ , $\eta^2 = 0.004$  |
| Stride Time Symmetry Index       | <b>F(1,73) = 12.003, <math>p = 0.001</math>, <math>\eta^2 = 0.141</math></b>    | F(1,73) = 0.005, $p = 0.942$ , $\eta^2 < 0.001$ | F(1,73) = 0.121, $p = 0.729$ , $\eta^2 = 0.002$  |

| <b>CoP Path Stance Phase CoV</b> |                                                                                     |                                                    |                                                                                 |
|----------------------------------|-------------------------------------------------------------------------------------|----------------------------------------------------|---------------------------------------------------------------------------------|
| CoV AP                           | <b>F(1,73) = 21.823, <math>p &lt; 0.001</math>,<br/><math>\eta^2 = 0.230</math></b> | F(1,73) = 0.525, $p = 0.471$ ,<br>$\eta^2 = 0.007$ | <b>F(1,73) = 9.970, <math>p = 0.002</math>,<br/><math>\eta^2 = 0.120</math></b> |
| CoV ML                           | <b>F(1,73) = 10.331, <math>p = 0.002</math>,<br/><math>\eta^2 = 0.124</math></b>    | F(1,73) = 0.131, $p = 0.718$ ,<br>$\eta^2 = 0.002$ | F(1,73) = 0.140, $p = 0.709$ ,<br>$\eta^2 = 0.002$                              |
| <b>Impulse (Ns/kg)</b>           |                                                                                     |                                                    |                                                                                 |
| Foot-strike to first peak (I1)   | <b>F(1,73) = 30.524, <math>p &lt; 0.001</math>,<br/><math>\eta^2 = 0.295</math></b> | F(1,73) = 0.107, $p = 0.744$ ,<br>$\eta^2 = 0.001$ | F(1,73) = 1.953, $p = 0.167$ ,<br>$\eta^2 = 0.026$                              |
| First peak to min (I2)           | <b>F(1,73) = 6.078, <math>p = 0.016</math>, <math>\eta^2 = 0.077</math></b>         | F(1,73) = 0.726, $p = 0.397$ ,<br>$\eta^2 = 0.010$ | F(1,73) = 1.936, $p = 0.168$ ,<br>$\eta^2 = 0.026$                              |
| Min to second peak (I3)          | <b>F(1,73) = 4.115, <math>p = 0.046</math>, <math>\eta^2 = 0.053</math></b>         | F(1,73) = 3.075, $p = 0.084$ ,<br>$\eta^2 = 0.040$ | F(1,73) = 0.050, $p = 0.824$ ,<br>$\eta^2 = 0.001$                              |
| Second peak to foot-off (I4)     | <b>F(1,73) = 22.006, <math>p &lt; 0.001</math>,<br/><math>\eta^2 = 0.232</math></b> | F(1,73) = 0.132, $p = 0.717$ ,<br>$\eta^2 = 0.002$ | F(1,73) = 0.257, $p = 0.614$ ,<br>$\eta^2 = 0.004$                              |
| Foot-strike to min (I5)          | <b>F(1,73) = 5.566, <math>p = 0.021</math>, <math>\eta^2 = 0.071</math></b>         | F(1,73) = 0.578, $p = 0.450$ ,<br>$\eta^2 = 0.008$ | F(1,73) = 1.921, $p = 0.170$ ,<br>$\eta^2 = 0.026$                              |
| Min to foot-off (I6)             | <b>F(1,73) = 21.351, <math>p &lt; 0.001</math>,<br/><math>\eta^2 = 0.226</math></b> | F(1,73) = 1.449, $p = 0.233$ ,<br>$\eta^2 = 0.019$ | F(1,73) = 0.060, $p = 0.807$ ,<br>$\eta^2 = 0.001$                              |
| Foot-strike to foot-off (I7)     | <b>F(1,73) = 22.578, <math>p &lt; 0.001</math>,<br/><math>\eta^2 = 0.236</math></b> | F(1,73) = 0.162, $p = 0.688$ ,<br>$\eta^2 = 0.002$ | F(1,73) = 1.037, $p = 0.312$ ,<br>$\eta^2 = 0.014$                              |

**Table S2.** Mixed-design ANOVA tests results for head accelerometer variables. Bold indicates a significant difference ( $p < 0.05$ ).

|                                                | Mixed-Design ANOVA Analysis                                                     |                                                                             |                                                 |
|------------------------------------------------|---------------------------------------------------------------------------------|-----------------------------------------------------------------------------|-------------------------------------------------|
|                                                | Walking Condition Main Effect                                                   | Faller/Non-Faller Status Main Effect                                        | Interaction Effect                              |
| <b>FFT First Quartile (%)</b>                  |                                                                                 |                                                                             |                                                 |
| Vertical                                       | <b>F(1,73) = 29.151, <math>p &lt; 0.001</math>, <math>\eta^2 = 0.285</math></b> | F(1,73) = 0.334, $p = 0.565$ , $\eta^2 = 0.005$                             | F(1,73) = 0.021, $p = 0.884$ , $\eta^2 < 0.001$ |
| AP                                             | <b>F(1,73) = 21.982, <math>p &lt; 0.001</math>, <math>\eta^2 = 0.231</math></b> | <b>F(1,73) = 4.217, <math>p = 0.044</math>, <math>\eta^2 = 0.055</math></b> | F(1,73) = 1.027, $p = 0.314$ , $\eta^2 = 0.014$ |
| ML                                             | <b>F(1,73) = 10.335, <math>p = 0.002</math>, <math>\eta^2 = 0.124</math></b>    | F(1,73) = 0.126, $p = 0.723$ , $\eta^2 = 0.002$                             | F(1,73) = 0.268, $p = 0.607$ , $\eta^2 = 0.004$ |
| <b>Ratio of Even to Odd Harmonics</b>          |                                                                                 |                                                                             |                                                 |
| Vertical                                       | <b>F(1,73) = 4.297, <math>p = 0.042</math>, <math>\eta^2 = 0.056</math></b>     | F(1,73) = 0.384, $p = 0.537$ , $\eta^2 = 0.005$                             | F(1,73) = 0.618, $p = 0.434$ , $\eta^2 = 0.008$ |
| AP                                             | <b>F(1,73) = 7.692, <math>p = 0.007</math>, <math>\eta^2 = 0.095</math></b>     | F(1,73) = 0.735, $p = 0.394$ , $\eta^2 = 0.010$                             | F(1,73) = 3.038, $p = 0.086$ , $\eta^2 = 0.040$ |
| ML                                             | F(1,73) = 1.104, $p = 0.297$ , $\eta^2 = 0.015$                                 | F(1,73) = 1.333, $p = 0.252$ , $\eta^2 = 0.018$                             | F(1,73) = 0.296, $p = 0.588$ , $\eta^2 = 0.004$ |
| <b>Maximum Lyapunov Exponent</b>               |                                                                                 |                                                                             |                                                 |
| Vertical                                       | F(1,73) = 2.846, $p = 0.096$ , $\eta^2 = 0.038$                                 | F(1,73) = 0.315, $p = 0.576$ , $\eta^2 = 0.004$                             | F(1,73) = 1.237, $p = 0.270$ , $\eta^2 = 0.017$ |
| AP                                             | F(1,73) = 0.106, $p = 0.746$ , $\eta^2 = 0.001$                                 | F(1,73) = 0.741, $p = 0.392$ , $\eta^2 = 0.010$                             | F(1,73) = 2.190, $p = 0.143$ , $\eta^2 = 0.029$ |
| ML                                             | <b>F(1,73) = 5.331, <math>p = 0.024</math>, <math>\eta^2 = 0.068</math></b>     | F(1,73) = 0.182, $p = 0.671$ , $\eta^2 = 0.002$                             | F(1,73) = 1.116, $p = 0.294$ , $\eta^2 = 0.015$ |
| <b>Acceleration Descriptive Statistics (g)</b> |                                                                                 |                                                                             |                                                 |
| Superior Max                                   | <b>F(1,73) = 29.960, <math>p &lt; 0.001</math>, <math>\eta^2 = 0.291</math></b> | <b>F(1,73) = 5.376, <math>p = 0.023</math>, <math>\eta^2 = 0.069</math></b> | F(1,73) = 0.101, $p = 0.751$ , $\eta^2 = 0.001$ |
| Superior Mean                                  | <b>F(1,73) = 22.368, <math>p &lt; 0.001</math>, <math>\eta^2 = 0.235</math></b> | F(1,73) = 3.131, $p = 0.081$ , $\eta^2 = 0.041$                             | F(1,73) = 0.793, $p = 0.376$ , $\eta^2 = 0.011$ |
| Superior SD                                    | <b>F(1,73) = 18.481, <math>p &lt; 0.001</math>, <math>\eta^2 = 0.202</math></b> | F(1,73) = 3.363, $p = 0.071$ , $\eta^2 = 0.044$                             | F(1,73) = 0.078, $p = 0.781$ , $\eta^2 = 0.001$ |
| Inferior Max                                   | F(1,73) = 2.013, $p = 0.160$ , $\eta^2 = 0.027$                                 | F(1,73) = 0.043, $p = 0.836$ , $\eta^2 = 0.001$                             | F(1,73) = 0.247, $p = 0.620$ , $\eta^2 = 0.003$ |
| Inferior Mean                                  | F(1,73) = 1.931, $p = 0.169$ , $\eta^2 = 0.026$                                 | F(1,73) = 0.118, $p = 0.732$ , $\eta^2 = 0.002$                             | F(1,73) = 0.123, $p = 0.726$ , $\eta^2 = 0.002$ |
| Inferior SD                                    | F(1,73) = 2.328, $p = 0.131$ , $\eta^2 = 0.031$                                 | F(1,73) = 0.019, $p = 0.891$ , $\eta^2 < 0.001$                             | F(1,73) = 0.186, $p = 0.668$ , $\eta^2 = 0.003$ |
| Anterior Max                                   | F(1,73) = 0.955, $p = 0.332$ , $\eta^2 = 0.013$                                 | F(1,73) = 0.921, $p = 0.340$ , $\eta^2 = 0.012$                             | F(1,73) = 0.123, $p = 0.727$ , $\eta^2 = 0.002$ |
| Anterior Mean                                  | <b>F(1,73) = 7.928, <math>p = 0.006</math>, <math>\eta^2 = 0.098</math></b>     | F(1,73) = 1.294, $p = 0.259$ , $\eta^2 = 0.017$                             | F(1,73) = 0.089, $p = 0.767$ , $\eta^2 = 0.001$ |
| Anterior SD                                    | F(1,73) = 1.836, $p = 0.180$ , $\eta^2 = 0.025$                                 | F(1,73) = 0.958, $p = 0.331$ , $\eta^2 = 0.013$                             | F(1,73) = 0.341, $p = 0.561$ , $\eta^2 = 0.005$ |
| Posterior Max                                  | F(1,73) = 0.021, $p = 0.885$ , $\eta^2 < 0.001$                                 | F(1,73) = 0.917, $p = 0.342$ , $\eta^2 = 0.012$                             | F(1,73) = 0.063, $p = 0.802$ , $\eta^2 = 0.001$ |
| Posterior Mean                                 | F(1,73) = 0.287, $p = 0.594$ , $\eta^2 = 0.004$                                 | F(1,73) = 0.323, $p = 0.571$ , $\eta^2 = 0.004$                             | F(1,73) = 0.006, $p = 0.939$ , $\eta^2 < 0.001$ |
| Posterior SD                                   | F(1,73) = 0.287, $p = 0.594$ , $\eta^2 = 0.004$                                 | F(1,73) = 0.822, $p = 0.368$ , $\eta^2 = 0.011$                             | F(1,73) = 0.002, $p = 0.960$ , $\eta^2 < 0.001$ |
| Right Max                                      | <b>F(1,73) = 8.653, <math>p = 0.004</math></b>                                  | F(1,73) = 0.021, $p = 0.884$                                                | F(1,73) = 1.253, $p = 0.267$                    |

|            |                                                         |                                                 |                                                 |
|------------|---------------------------------------------------------|-------------------------------------------------|-------------------------------------------------|
|            | $\eta^2 = 0.106$                                        | $\eta^2 < 0.001$                                | $\eta^2 = 0.017$                                |
| Right Mean | <b>F(1,73) = 10.375, p = 0.002,</b><br>$\eta^2 = 0.124$ | F(1,73) = 0.340, p = 0.562,<br>$\eta^2 = 0.005$ | F(1,73) = 0.075, p = 0.784,<br>$\eta^2 = 0.001$ |
| Right SD   | <b>F(1,73) = 10.907, p = 0.001,</b><br>$\eta^2 = 0.130$ | F(1,73) = 0.007, p = 0.935,<br>$\eta^2 < 0.001$ | F(1,73) = 0.842, p = 0.362,<br>$\eta^2 = 0.011$ |
| Left Max   | F(1,73) = 2.022, p = 0.159,<br>$\eta^2 = 0.027$         | F(1,73) = 0.879, p = 0.352,<br>$\eta^2 = 0.012$ | F(1,73) = 2.011, p = 0.160,<br>$\eta^2 = 0.027$ |
| Left Mean  | F(1,73) = 2.989, p = 0.088,<br>$\eta^2 = 0.039$         | F(1,73) = 1.952, p = 0.167,<br>$\eta^2 = 0.026$ | F(1,73) = 3.087, p = 0.083,<br>$\eta^2 = 0.041$ |
| Left SD    | F(1,73) = 0.602, p = 0.440,<br>$\eta^2 = 0.008$         | F(1,73) = 0.453, p = 0.503,<br>$\eta^2 = 0.006$ | F(1,73) = 1.253, p = 0.267,<br>$\eta^2 = 0.017$ |

**Table S3.** Mixed-design ANOVA tests results for posterior pelvis accelerometer variables. Bold indicates a significant difference ( $p < 0.05$ ).

|                                                | Mixed-Design ANOVA Analysis                                                     |                                                 |                                                 |
|------------------------------------------------|---------------------------------------------------------------------------------|-------------------------------------------------|-------------------------------------------------|
|                                                | Walking Condition Main Effect                                                   | Faller/Non-Faller Status Main Effect            | Interaction Effect                              |
| <b>FFT First Quartile (%)</b>                  |                                                                                 |                                                 |                                                 |
| Vertical                                       | <b>F(1,71) = 33.338, <math>p &lt; 0.001</math>, <math>\eta^2 = 0.320</math></b> | F(1,71) = 0.259, $p = 0.612$ , $\eta^2 = 0.004$ | F(1,71) = 0.422, $p = 0.518$ , $\eta^2 = 0.006$ |
| AP                                             | <b>F(1,71) = 8.637, <math>p = 0.004</math>, <math>\eta^2 = 0.108</math></b>     | F(1,71) = 1.981, $p = 0.164$ , $\eta^2 = 0.027$ | F(1,71) = 0.023, $p = 0.879$ , $\eta^2 < 0.001$ |
| ML                                             | <b>F(1,71) = 12.400, <math>p = 0.001</math>, <math>\eta^2 = 0.149</math></b>    | F(1,71) = 0.076, $p = 0.784$ , $\eta^2 = 0.001$ | F(1,71) = 0.478, $p = 0.491$ , $\eta^2 = 0.007$ |
| <b>Ratio of Even to Odd Harmonics</b>          |                                                                                 |                                                 |                                                 |
| Vertical                                       | <b>F(1,71) = 4.108, <math>p = 0.046</math>, <math>\eta^2 = 0.055</math></b>     | F(1,71) = 0.001, $p = 0.971$ , $\eta^2 < 0.001$ | F(1,71) = 0.162, $p = 0.688$ , $\eta^2 = 0.002$ |
| AP                                             | <b>F(1,71) = 5.850, <math>p = 0.018</math>, <math>\eta^2 = 0.076</math></b>     | F(1,71) = 0.342, $p = 0.560$ , $\eta^2 = 0.005$ | F(1,71) = 0.084, $p = 0.773$ , $\eta^2 = 0.001$ |
| ML                                             | F(1,71) = 0.792, $p = 0.377$ , $\eta^2 = 0.011$                                 | F(1,71) = 0.030, $p = 0.862$ , $\eta^2 < 0.001$ | F(1,71) = 0.004, $p = 0.953$ , $\eta^2 < 0.001$ |
| <b>Maximum Lyapunov Exponent</b>               |                                                                                 |                                                 |                                                 |
| Vertical                                       | F(1,71) = 3.627, $p = 0.061$ , $\eta^2 = 0.049$                                 | F(1,71) = 0.012, $p = 0.912$ , $\eta^2 < 0.001$ | F(1,71) = 0.744, $p = 0.391$ , $\eta^2 = 0.010$ |
| AP                                             | F(1,71) = 0.073, $p = 0.789$ , $\eta^2 = 0.001$                                 | F(1,71) = 0.008, $p = 0.928$ , $\eta^2 < 0.001$ | F(1,71) = 0.051, $p = 0.822$ , $\eta^2 = 0.001$ |
| ML                                             | <b>F(1,71) = 6.913, <math>p = 0.010</math>, <math>\eta^2 = 0.089</math></b>     | F(1,71) = 2.688, $p = 0.106$ , $\eta^2 = 0.036$ | F(1,71) = 0.002, $p = 0.969$ , $\eta^2 < 0.001$ |
| <b>Acceleration Descriptive Statistics (g)</b> |                                                                                 |                                                 |                                                 |
| Superior Max                                   | <b>F(1,71) = 5.609, <math>p = 0.021</math>, <math>\eta^2 = 0.073</math></b>     | F(1,71) = 0.741, $p = 0.392$ , $\eta^2 = 0.010$ | F(1,71) = 0.864, $p = 0.356$ , $\eta^2 = 0.012$ |
| Superior Mean                                  | <b>F(1,71) = 17.158, <math>p &lt; 0.001</math>, <math>\eta^2 = 0.195</math></b> | F(1,71) = 0.142, $p = 0.708$ , $\eta^2 = 0.002$ | F(1,71) = 0.863, $p = 0.356$ , $\eta^2 = 0.012$ |
| Superior SD                                    | <b>F(1,71) = 18.516, <math>p &lt; 0.001</math>, <math>\eta^2 = 0.207</math></b> | F(1,71) = 0.473, $p = 0.494$ , $\eta^2 = 0.007$ | F(1,71) = 0.827, $p = 0.366$ , $\eta^2 = 0.012$ |
| Inferior Max                                   | <b>F(1,71) = 21.109, <math>p &lt; 0.001</math>, <math>\eta^2 = 0.229</math></b> | F(1,71) = 0.605, $p = 0.439$ , $\eta^2 = 0.008$ | F(1,71) = 1.682, $p = 0.199$ , $\eta^2 = 0.023$ |
| Inferior Mean                                  | <b>F(1,71) = 19.490, <math>p &lt; 0.001</math>, <math>\eta^2 = 0.215</math></b> | F(1,71) = 0.272, $p = 0.603$ , $\eta^2 = 0.004$ | F(1,71) = 1.404, $p = 0.240$ , $\eta^2 = 0.019$ |
| Inferior SD                                    | <b>F(1,71) = 26.319, <math>p &lt; 0.001</math>, <math>\eta^2 = 0.270</math></b> | F(1,71) = 0.663, $p = 0.418$ , $\eta^2 = 0.009$ | F(1,71) = 2.666, $p = 0.107$ , $\eta^2 = 0.036$ |
| Anterior Max                                   | <b>F(1,71) = 29.255, <math>p &lt; 0.001</math>, <math>\eta^2 = 0.292</math></b> | F(1,71) = 1.067, $p = 0.305$ , $\eta^2 = 0.015$ | F(1,71) = 2.602, $p = 0.111$ , $\eta^2 = 0.035$ |
| Anterior Mean                                  | <b>F(1,71) = 15.505, <math>p &lt; 0.001</math>, <math>\eta^2 = 0.179</math></b> | F(1,71) = 1.203, $p = 0.276$ , $\eta^2 = 0.017$ | F(1,71) = 1.062, $p = 0.306$ , $\eta^2 = 0.015$ |
| Anterior SD                                    | <b>F(1,71) = 32.727, <math>p &lt; 0.001</math>, <math>\eta^2 = 0.316</math></b> | F(1,71) = 1.405, $p = 0.240$ , $\eta^2 = 0.019$ | F(1,71) = 1.627, $p = 0.206$ , $\eta^2 = 0.022$ |
| Posterior Max                                  | <b>F(1,71) = 7.766, <math>p = 0.007</math>, <math>\eta^2 = 0.099</math></b>     | F(1,71) = 1.163, $p = 0.284$ , $\eta^2 = 0.016$ | F(1,71) = 0.138, $p = 0.711$ , $\eta^2 = 0.002$ |
| Posterior Mean                                 | <b>F(1,71) = 9.866, <math>p = 0.002</math>, <math>\eta^2 = 0.122</math></b>     | F(1,71) = 0.060, $p = 0.807$ , $\eta^2 = 0.001$ | F(1,71) = 0.324, $p = 0.571$ , $\eta^2 = 0.005$ |
| Posterior SD                                   | <b>F(1,71) = 10.708, <math>p = 0.002</math>, <math>\eta^2 = 0.131</math></b>    | F(1,71) = 1.176, $p = 0.282$ , $\eta^2 = 0.016$ | F(1,71) = 0.070, $p = 0.792$ , $\eta^2 = 0.001$ |
| Right Max                                      | <b>F(1,71) = 22.869, <math>p &lt; 0.001</math>,</b>                             | F(1,71) = 2.124, $p = 0.149$ ,                  | F(1,71) = 3.910, $p = 0.052$ ,                  |

|            |                                                                                     |                                                    |                                                    |
|------------|-------------------------------------------------------------------------------------|----------------------------------------------------|----------------------------------------------------|
|            | $\eta^2 = 0.244$                                                                    | $\eta^2 = 0.029$                                   | $\eta^2 = 0.052$                                   |
| Right Mean | <b>F(1,71) = 21.995, <math>p &lt; 0.001</math>,<br/><math>\eta^2 = 0.237</math></b> | F(1,71) = 1.866, $p = 0.176$ ,<br>$\eta^2 = 0.026$ | F(1,71) = 2.833, $p = 0.097$ ,<br>$\eta^2 = 0.038$ |
| Right SD   | <b>F(1,71) = 27.996, <math>p &lt; 0.001</math>,<br/><math>\eta^2 = 0.283</math></b> | F(1,71) = 2.958, $p = 0.090$ ,<br>$\eta^2 = 0.040$ | F(1,71) = 3.506, $p = 0.065$ ,<br>$\eta^2 = 0.047$ |
| Left Max   | <b>F(1,71) = 11.974, <math>p = 0.001</math>,<br/><math>\eta^2 = 0.144</math></b>    | F(1,71) = 0.319, $p = 0.574$ ,<br>$\eta^2 = 0.004$ | F(1,71) = 0.686, $p = 0.410$ ,<br>$\eta^2 = 0.010$ |
| Left Mean  | <b>F(1,71) = 22.865, <math>p &lt; 0.001</math>,<br/><math>\eta^2 = 0.244</math></b> | F(1,71) = 0.001, $p = 0.972$ ,<br>$\eta^2 < 0.001$ | F(1,71) = 0.841, $p = 0.362$ ,<br>$\eta^2 = 0.012$ |
| Left SD    | <b>F(1,71) = 26.720, <math>p &lt; 0.001</math>,<br/><math>\eta^2 = 0.273</math></b> | F(1,71) = 0.118, $p = 0.733$ ,<br>$\eta^2 = 0.002$ | F(1,71) = 0.992, $p = 0.323$ ,<br>$\eta^2 = 0.014$ |

**Table S4.** Mixed-design ANOVA tests results for right shank accelerometer variables. Bold indicates a significant difference ( $p < 0.05$ ).

|                                                | Mixed-Design ANOVA Analysis                                                     |                                                 |                                                                             |
|------------------------------------------------|---------------------------------------------------------------------------------|-------------------------------------------------|-----------------------------------------------------------------------------|
|                                                | Walking Condition Main Effect                                                   | Faller/Non-Faller Status Main Effect            | Interaction Effect                                                          |
| <b>FFT First Quartile (%)</b>                  |                                                                                 |                                                 |                                                                             |
| Vertical                                       | <b>F(1,73) = 30.897, <math>p &lt; 0.001</math>, <math>\eta^2 = 0.297</math></b> | F(1,73) = 0.044, $p = 0.834$ , $\eta^2 = 0.001$ | F(1,73) = 0.022, $p = 0.884$ , $\eta^2 < 0.001$                             |
| AP                                             | <b>F(1,73) = 42.588, <math>p &lt; 0.001</math>, <math>\eta^2 = 0.368</math></b> | F(1,73) = 1.753, $p = 0.190$ , $\eta^2 = 0.023$ | F(1,73) = 0.301, $p = 0.585$ , $\eta^2 = 0.004$                             |
| ML                                             | <b>F(1,73) = 47.478, <math>p &lt; 0.001</math>, <math>\eta^2 = 0.394</math></b> | F(1,73) = 1.491, $p = 0.226$ , $\eta^2 = 0.020$ | F(1,73) = 0.287, $p = 0.594$ , $\eta^2 = 0.004$                             |
| <b>Ratio of Even to Odd Harmonics</b>          |                                                                                 |                                                 |                                                                             |
| Vertical                                       | F(1,73) = 1.463, $p = 0.230$ , $\eta^2 = 0.020$                                 | F(1,73) = 0.001, $p = 0.975$ , $\eta^2 < 0.001$ | F(1,73) = 0.053, $p = 0.818$ , $\eta^2 = 0.001$                             |
| AP                                             | F(1,73) = 0.021, $p = 0.885$ , $\eta^2 < 0.001$                                 | F(1,73) = 0.001, $p = 0.975$ , $\eta^2 < 0.001$ | F(1,73) = 0.058, $p = 0.810$ , $\eta^2 = 0.001$                             |
| ML                                             | F(1,73) = 3.334, $p = 0.072$ , $\eta^2 = 0.044$                                 | F(1,73) = 1.352, $p = 0.249$ , $\eta^2 = 0.018$ | F(1,73) = 2.087, $p = 0.153$ , $\eta^2 = 0.028$                             |
| <b>Maximum Lyapunov Exponent</b>               |                                                                                 |                                                 |                                                                             |
| Vertical                                       | F(1,73) = 0.202, $p = 0.654$ , $\eta^2 = 0.003$                                 | F(1,73) = 0.634, $p = 0.428$ , $\eta^2 = 0.009$ | F(1,73) = 0.059, $p = 0.809$ , $\eta^2 = 0.001$                             |
| AP                                             | <b>F(1,73) = 7.656, <math>p = 0.007</math>, <math>\eta^2 = 0.095</math></b>     | F(1,73) = 0.156, $p = 0.694$ , $\eta^2 = 0.002$ | F(1,73) = 0.324, $p = 0.571$ , $\eta^2 = 0.004$                             |
| ML                                             | F(1,73) = 3.249, $p = 0.076$ , $\eta^2 = 0.043$                                 | F(1,73) = 0.324, $p = 0.571$ , $\eta^2 = 0.004$ | F(1,73) = 0.799, $p = 0.374$ , $\eta^2 = 0.011$                             |
| <b>Acceleration Descriptive Statistics (g)</b> |                                                                                 |                                                 |                                                                             |
| Superior Max                                   | <b>F(1,73) = 8.303, <math>p = 0.005</math>, <math>\eta^2 = 0.102</math></b>     | F(1,73) = 1.820, $p = 0.182$ , $\eta^2 = 0.024$ | <b>F(1,73) = 6.279, <math>p = 0.014</math>, <math>\eta^2 = 0.079</math></b> |
| Superior Mean                                  | <b>F(1,73) = 5.796, <math>p = 0.019</math>, <math>\eta^2 = 0.074</math></b>     | F(1,73) = 2.956, $p = 0.090$ , $\eta^2 = 0.039$ | F(1,73) = 1.677, $p = 0.199$ , $\eta^2 = 0.022$                             |
| Superior SD                                    | <b>F(1,73) = 13.103, <math>p = 0.001</math>, <math>\eta^2 = 0.152</math></b>    | F(1,73) = 1.753, $p = 0.190$ , $\eta^2 = 0.023$ | <b>F(1,73) = 4.513, <math>p = 0.037</math>, <math>\eta^2 = 0.058</math></b> |
| Inferior Max                                   | <b>F(1,73) = 27.457, <math>p &lt; 0.001</math>, <math>\eta^2 = 0.273</math></b> | F(1,73) = 0.488, $p = 0.487$ , $\eta^2 = 0.007$ | F(1,73) = 2.097, $p = 0.152$ , $\eta^2 = 0.028$                             |
| Inferior Mean                                  | <b>F(1,73) = 30.777, <math>p &lt; 0.001</math>, <math>\eta^2 = 0.297</math></b> | F(1,73) = 0.336, $p = 0.564$ , $\eta^2 = 0.005$ | F(1,73) = 0.393, $p = 0.533$ , $\eta^2 = 0.005$                             |
| Inferior SD                                    | <b>F(1,73) = 42.857, <math>p &lt; 0.001</math>, <math>\eta^2 = 0.370</math></b> | F(1,73) = 0.404, $p = 0.527$ , $\eta^2 = 0.006$ | F(1,73) = 1.987, $p = 0.163$ , $\eta^2 = 0.027$                             |
| Anterior Max                                   | <b>F(1,73) = 39.795, <math>p &lt; 0.001</math>, <math>\eta^2 = 0.353</math></b> | F(1,73) = 0.131, $p = 0.718$ , $\eta^2 = 0.002$ | F(1,73) = 2.950, $p = 0.090$ , $\eta^2 = 0.039$                             |
| Anterior Mean                                  | <b>F(1,73) = 43.567, <math>p &lt; 0.001</math>, <math>\eta^2 = 0.374</math></b> | F(1,73) = 0.435, $p = 0.512$ , $\eta^2 = 0.006$ | F(1,73) = 2.218, $p = 0.141$ , $\eta^2 = 0.029$                             |
| Anterior SD                                    | <b>F(1,73) = 45.927, <math>p &lt; 0.001</math>, <math>\eta^2 = 0.386</math></b> | F(1,73) = 0.691, $p = 0.409$ , $\eta^2 = 0.009$ | F(1,73) = 2.405, $p = 0.125$ , $\eta^2 = 0.032$                             |
| Posterior Max                                  | F(1,73) = 0.384, $p = 0.537$ , $\eta^2 = 0.005$                                 | F(1,73) = 0.210, $p = 0.648$ , $\eta^2 = 0.003$ | F(1,73) = 0.265, $p = 0.608$ , $\eta^2 = 0.004$                             |
| Posterior Mean                                 | <b>F(1,73) = 10.992, <math>p = 0.001</math>, <math>\eta^2 = 0.131</math></b>    | F(1,73) = 0.389, $p = 0.535$ , $\eta^2 = 0.005$ | F(1,73) = 2.896, $p = 0.093$ , $\eta^2 = 0.038$                             |
| Posterior SD                                   | F(1,73) = 1.438, $p = 0.234$ , $\eta^2 = 0.019$                                 | F(1,73) = 0.005, $p = 0.943$ , $\eta^2 < 0.001$ | F(1,73) = 0.034, $p = 0.854$ , $\eta^2 < 0.001$                             |
| Right Max                                      | <b>F(1,73) = 27.236, <math>p &lt; 0.001</math>,</b>                             | F(1,73) = 0.748, $p = 0.390$ ,                  | F(1,73) < 0.001, $p = 0.987$ ,                                              |

|            |                                                                                     |                                                    |                                                    |
|------------|-------------------------------------------------------------------------------------|----------------------------------------------------|----------------------------------------------------|
|            | $\eta^2 = 0.272$                                                                    | $\eta^2 = 0.010$                                   | $\eta^2 < 0.001$                                   |
| Right Mean | <b>F(1,73) = 19.773, <math>p &lt; 0.001</math>,<br/><math>\eta^2 = 0.213</math></b> | F(1,73) = 1.263, $p = 0.265$ ,<br>$\eta^2 = 0.017$ | F(1,73) = 0.075, $p = 0.786$ ,<br>$\eta^2 = 0.001$ |
| Right SD   | <b>F(1,73) = 35.211, <math>p &lt; 0.001</math>,<br/><math>\eta^2 = 0.325</math></b> | F(1,73) = 1.197, $p = 0.278$ ,<br>$\eta^2 = 0.016$ | F(1,73) = 0.137, $p = 0.712$ ,<br>$\eta^2 = 0.002$ |
| Left Max   | <b>F(1,73) = 19.078, <math>p &lt; 0.001</math>,<br/><math>\eta^2 = 0.207</math></b> | F(1,73) = 0.142, $p = 0.707$ ,<br>$\eta^2 = 0.002$ | F(1,73) = 3.014, $p = 0.087$ ,<br>$\eta^2 = 0.040$ |
| Left Mean  | <b>F(1,73) = 26.078, <math>p &lt; 0.001</math>,<br/><math>\eta^2 = 0.263</math></b> | F(1,73) = 0.157, $p = 0.693$ ,<br>$\eta^2 = 0.002$ | F(1,73) = 3.015, $p = 0.087$ ,<br>$\eta^2 = 0.040$ |
| Left SD    | <b>F(1,73) = 32.828, <math>p &lt; 0.001</math>,<br/><math>\eta^2 = 0.310</math></b> | F(1,73) = 0.032, $p = 0.859$ ,<br>$\eta^2 < 0.001$ | F(1,73) = 1.906, $p = 0.172$ ,<br>$\eta^2 = 0.025$ |



**Table S5.** Mixed-design ANOVA tests results for left shank accelerometer variables. Bold indicates a significant difference ( $p < 0.05$ ).

|                                                | Mixed-Design ANOVA Analysis                                                     |                                                                             |                                                                             |
|------------------------------------------------|---------------------------------------------------------------------------------|-----------------------------------------------------------------------------|-----------------------------------------------------------------------------|
|                                                | Walking Condition Main Effect                                                   | Faller/Non-Faller Status Main Effect                                        | Interaction Effect                                                          |
| <b>FFT First Quartile (%)</b>                  |                                                                                 |                                                                             |                                                                             |
| Vertical                                       | <b>F(1,72) = 20.535, <math>p &lt; 0.001</math>, <math>\eta^2 = 0.222</math></b> | F(1,72) = 0.623, $p = 0.433$ , $\eta^2 = 0.009$                             | F(1,72) = 0.536, $p = 0.467$ , $\eta^2 = 0.007$                             |
| AP                                             | <b>F(1,72) = 36.656, <math>p &lt; 0.001</math>, <math>\eta^2 = 0.337</math></b> | F(1,72) = 0.846, $p = 0.361$ , $\eta^2 = 0.012$                             | F(1,72) = 0.373, $p = 0.543$ , $\eta^2 = 0.005$                             |
| ML                                             | <b>F(1,72) = 21.428, <math>p &lt; 0.001</math>, <math>\eta^2 = 0.229</math></b> | <b>F(1,72) = 4.360, <math>p = 0.040</math>, <math>\eta^2 = 0.057</math></b> | F(1,72) = 0.619, $p = 0.434$ , $\eta^2 = 0.009$                             |
| <b>Ratio of Even to Odd Harmonics</b>          |                                                                                 |                                                                             |                                                                             |
| Vertical                                       | F(1,72) = 1.492, $p = 0.226$ , $\eta^2 = 0.020$                                 | F(1,72) = 0.010, $p = 0.921$ , $\eta^2 < 0.001$                             | <b>F(1,72) = 4.279, <math>p = 0.042</math>, <math>\eta^2 = 0.056</math></b> |
| AP                                             | F(1,72) = 0.082, $p = 0.775$ , $\eta^2 = 0.001$                                 | F(1,72) = 0.006, $p = 0.940$ , $\eta^2 < 0.001$                             | F(1,72) = 0.593, $p = 0.444$ , $\eta^2 = 0.008$                             |
| ML                                             | F(1,72) = 0.003, $p = 0.958$ , $\eta^2 < 0.001$                                 | F(1,72) = 0.305, $p = 0.583$ , $\eta^2 = 0.004$                             | F(1,72) = 0.719, $p = 0.399$ , $\eta^2 = 0.010$                             |
| <b>Maximum Lyapunov Exponent</b>               |                                                                                 |                                                                             |                                                                             |
| Vertical                                       | F(1,72) = 0.088, $p = 0.768$ , $\eta^2 = 0.001$                                 | F(1,72) = 0.464, $p = 0.498$ , $\eta^2 = 0.006$                             | F(1,72) = 0.207, $p = 0.651$ , $\eta^2 = 0.003$                             |
| AP                                             | <b>F(1,72) = 8.853, <math>p = 0.004</math>, <math>\eta^2 = 0.109</math></b>     | F(1,72) = 0.206, $p = 0.651$ , $\eta^2 = 0.003$                             | F(1,72) = 3.730, $p = 0.057$ , $\eta^2 = 0.049$                             |
| ML                                             | <b>F(1,72) = 18.213, <math>p &lt; 0.001</math>, <math>\eta^2 = 0.202</math></b> | F(1,72) = 0.156, $p = 0.694$ , $\eta^2 = 0.002$                             | F(1,72) = 0.853, $p = 0.359$ , $\eta^2 = 0.012$                             |
| <b>Acceleration Descriptive Statistics (g)</b> |                                                                                 |                                                                             |                                                                             |
| Superior Max                                   | <b>F(1,72) = 27.371, <math>p &lt; 0.001</math>, <math>\eta^2 = 0.275</math></b> | F(1,72) = 0.068, $p = 0.795$ , $\eta^2 = 0.001$                             | F(1,72) = 0.865, $p = 0.355$ , $\eta^2 = 0.012$                             |
| Superior Mean                                  | <b>F(1,72) = 33.402, <math>p &lt; 0.001</math>, <math>\eta^2 = 0.317</math></b> | F(1,72) = 0.259, $p = 0.612$ , $\eta^2 = 0.004$                             | F(1,72) = 2.604, $p = 0.111$ , $\eta^2 = 0.035$                             |
| Superior SD                                    | <b>F(1,72) = 35.620, <math>p &lt; 0.001</math>, <math>\eta^2 = 0.331</math></b> | F(1,72) = 0.052, $p = 0.820$ , $\eta^2 = 0.001$                             | F(1,72) = 1.000, $p = 0.321$ , $\eta^2 = 0.014$                             |
| Inferior Max                                   | <b>F(1,72) = 15.530, <math>p &lt; 0.001</math>, <math>\eta^2 = 0.177</math></b> | F(1,72) = 0.105, $p = 0.746$ , $\eta^2 = 0.001$                             | F(1,72) = 0.353, $p = 0.554$ , $\eta^2 = 0.005$                             |
| Inferior Mean                                  | <b>F(1,72) = 28.405, <math>p &lt; 0.001</math>, <math>\eta^2 = 0.283</math></b> | F(1,72) = 0.874, $p = 0.353$ , $\eta^2 = 0.012$                             | F(1,72) = 1.235, $p = 0.270$ , $\eta^2 = 0.017$                             |
| Inferior SD                                    | <b>F(1,72) = 25.728, <math>p &lt; 0.001</math>, <math>\eta^2 = 0.263</math></b> | F(1,72) = 0.257, $p = 0.614$ , $\eta^2 = 0.004$                             | F(1,72) = 0.877, $p = 0.352$ , $\eta^2 = 0.012$                             |
| Anterior Max                                   | <b>F(1,72) = 43.355, <math>p &lt; 0.001</math>, <math>\eta^2 = 0.376</math></b> | F(1,72) = 0.493, $p = 0.485$ , $\eta^2 = 0.007$                             | F(1,72) = 0.540, $p = 0.465$ , $\eta^2 = 0.007$                             |
| Anterior Mean                                  | <b>F(1,72) = 46.233, <math>p &lt; 0.001</math>, <math>\eta^2 = 0.391</math></b> | F(1,72) = 0.714, $p = 0.401$ , $\eta^2 = 0.010$                             | F(1,72) = 0.290, $p = 0.592$ , $\eta^2 = 0.004$                             |
| Anterior SD                                    | <b>F(1,72) = 52.633, <math>p &lt; 0.001</math>, <math>\eta^2 = 0.422</math></b> | F(1,72) = 0.263, $p = 0.610$ , $\eta^2 = 0.004$                             | F(1,72) = 1.052, $p = 0.309$ , $\eta^2 = 0.014$                             |
| Posterior Max                                  | F(1,72) = 0.474, $p = 0.493$ , $\eta^2 = 0.007$                                 | F(1,72) = 0.290, $p = 0.592$ , $\eta^2 = 0.004$                             | F(1,72) = 1.918, $p = 0.170$ , $\eta^2 = 0.026$                             |
| Posterior Mean                                 | <b>F(1,72) = 19.140, <math>p &lt; 0.001</math>, <math>\eta^2 = 0.210</math></b> | F(1,72) = 0.985, $p = 0.324$ , $\eta^2 = 0.013$                             | F(1,72) = 1.246, $p = 0.268$ , $\eta^2 = 0.017$                             |
| Posterior SD                                   | <b>F(1,72) = 5.384, <math>p = 0.023</math>, <math>\eta^2 = 0.070</math></b>     | F(1,72) = 0.481, $p = 0.490$ , $\eta^2 = 0.007$                             | F(1,72) = 2.833, $p = 0.097$ , $\eta^2 = 0.038$                             |
| Right Max                                      | F(1,72) = 3.181, $p = 0.079$ ,                                                  | F(1,72) = 0.002, $p = 0.967$ ,                                              | F(1,72) = 0.108, $p = 0.743$ ,                                              |

|            |                                                                                     |                                                    |                                                    |
|------------|-------------------------------------------------------------------------------------|----------------------------------------------------|----------------------------------------------------|
|            | $\eta^2 = 0.042$                                                                    | $\eta^2 < 0.001$                                   | $\eta^2 = 0.002$                                   |
| Right Mean | <b>F(1,72) = 17.639, <math>p &lt; 0.001</math>,<br/><math>\eta^2 = 0.197</math></b> | F(1,72) = 0.118, $p = 0.732$ ,<br>$\eta^2 = 0.002$ | F(1,72) = 0.019, $p = 0.891$ ,<br>$\eta^2 < 0.001$ |
| Right SD   | <b>F(1,72) = 8.560, <math>p = 0.005</math>,<br/><math>\eta^2 = 0.106</math></b>     | F(1,72) = 0.483, $p = 0.489$ ,<br>$\eta^2 = 0.007$ | F(1,72) = 0.102, $p = 0.751$ ,<br>$\eta^2 = 0.001$ |
| Left Max   | <b>F(1,72) = 23.183, <math>p &lt; 0.001</math>,<br/><math>\eta^2 = 0.244</math></b> | F(1,72) = 0.014, $p = 0.905$ ,<br>$\eta^2 < 0.001$ | F(1,72) = 1.351, $p = 0.249$ ,<br>$\eta^2 = 0.018$ |
| Left Mean  | <b>F(1,72) = 25.453, <math>p &lt; 0.001</math>,<br/><math>\eta^2 = 0.261</math></b> | F(1,72) = 0.886, $p = 0.350$ ,<br>$\eta^2 = 0.012$ | F(1,72) = 1.577, $p = 0.213$ ,<br>$\eta^2 = 0.021$ |
| Left SD    | <b>F(1,72) = 25.796, <math>p &lt; 0.001</math>,<br/><math>\eta^2 = 0.264</math></b> | F(1,72) = 0.147, $p = 0.703$ ,<br>$\eta^2 = 0.002$ | F(1,72) = 1.434, $p = 0.235$ ,<br>$\eta^2 = 0.020$ |
